# Supplementary material for: Ice nucleation activity of iron oxides via immersion freezing and an examination of the high ice nucleation activity of FeO
Source: Royal Society of Chemistry journal article supplement (doi:10.1039/d0cp04220j), 2021-01-01
Supplement: d0cp04220j1.pdf [file d0cp04220j1.pdf]

**Electronic Supplementary Information for:**

Ice Nucleation Activity of Iron Oxides *via* Immersion Freezing and an

Examination of the High Ice Nucleation Activity of FeO

Esther Chong, Katherine E. Marak, Yang Li, and Miriam Arak Freedman\*

*Department of Chemistry, The Pennsylvania State University, University Park, PA*

*16802, USA*

**Summary:** The supporting information contains a table with the lattice parameters of the iron oxide samples and their lattice mismatch with respect to cubic ice.

**Table S1.** The lattice mismatch along the a-, b-, and c-axes of the iron oxide samples with respect to cubic ice, I<sub>c</sub>, to three significant figures.

|                                                                             | Lattice parameters <sup>c</sup> |      |      | Lattice mismatch along the axis |       |       |
|-----------------------------------------------------------------------------|---------------------------------|------|------|---------------------------------|-------|-------|
|                                                                             | a                               | b    | c    | a (%)                           | b (%) | c (%) |
| I <sub>c</sub>                                                              | 6.53                            | 6.53 | 6.53 | -                               | -     | -     |
| AgI <sup>a</sup>                                                            | 4.68                            | 4.68 | 7.66 | -28.3                           | -28.3 | 17.3  |
| Corundum <sup>b</sup><br>[α-Al <sub>2</sub> O <sub>3</sub> ]<br>(Hexagonal) | 4.77                            | 4.77 | 13.0 | -27.0                           | -27.0 | 99.4  |
| Hematite<br>[Fe <sub>2</sub> O <sub>3</sub> ]<br>(Hexagonal)                | 5.03                            | 5.03 | 13.8 | -22.9                           | -22.9 | 111   |
| Magnetite<br>[Fe <sub>3</sub> O <sub>4</sub> ]<br>(Hexagonal)               | 5.93                            | 5.93 | 14.6 | -9.24                           | -9.24 | 123   |
| Goethite<br>[FeOOH]<br>(Orthorhombic)                                       | 4.61                            | 9.99 | 3.03 | -29.3                           | 52.9  | -53.6 |
| Wüstite<br>[FeO]<br>(Cubic)                                                 | 4.31                            | 4.31 | 4.31 | -34.1                           | -34.1 | -34.1 |

<sup>a</sup>The lattice parameters of I<sub>h</sub> and AgI were obtained from Cox et al. (2012).<sup>1</sup>

<sup>b</sup>The lattice parameters of corundum were taken from Chong et al. (2019).<sup>2</sup>

<sup>c</sup>The lattice parameters for the samples and I<sub>c</sub> were determined from whole pattern fitting using Jade software.

## References:

- (1) Cox, S. J.; Kathmann, S. M.; Purton, J. A.; Gillan, M. J.; Michaelides, A. Non-Hexagonal Ice at Hexagonal Surfaces: The Role of Lattice Mismatch. *Physical Chemistry Chemical Physics* **2012**, *14* (22), 7944-7949.
- (2) Chong, E.; King, M.; Marak, K. E.; Freedman, M. A. The Effect of Crystallinity and Crystal Structure on the Immersion Freezing of Alumina. *Journal of Physical Chemistry A* **2019**, *123* (12), 2447–2456.
